# Supplementary material
Source: Springer Nature journal article supplement (https://www.springermedizin.de/resource/supplementary/12943_2009_480_MOESM4_ESM.pdf/9554390)
Supplement: MOESM4 [file 9554390]

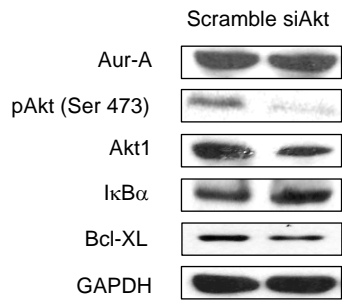

Additional file 4
